# Supplementary material for: HPV and Cytology Testing in Women Undergoing 9-Valent HPV Opportunistic Vaccination: A Single-Cohort Follow Up Study
Source: MDPI journal article supplement (doi:10.3390/vaccines9060643), 2021-06-12
Supplement: s1 [file s1]

## Supplementary Materials

**Table S1.** Comparison of Cox regression model results for the evaluation of a possible confounding effect of age at event for time to negativization of a positive Pap smear. Model 1 is the univariate model, Model 2 is the model including age as a continuous variable and Model 3 is the model including age in 5 classes.

| Variable            | Model 1             | Model 2             | Model 3             |
|---------------------|---------------------|---------------------|---------------------|
| <b>HPV Vaccine</b>  |                     |                     |                     |
| No vaccine          | 1.00                | 1.00                | 1.00                |
| 1° dose             | 0.70 (0.36-1.33)    | 0.69 (0.36-1.32)    | 0.69 (0.36-1.32)    |
| 1°+2° dose          | 0.95 (0.60-1.52)    | 0.94 (0.59-1.50)    | 0.94 (0.59-1.51)    |
| 1°+2°+3° dose       | 2.66 (1.83-3.86) ** | 2.60 (1.79-3.78) ** | 2.58 (1.77-3.77) ** |
| <b>Age at event</b> |                     |                     |                     |
| +1 yr               |                     | 0.99 (0.97-1.00)    |                     |
| <25                 |                     |                     | 1.00                |
| 25-30               |                     |                     | 1.18 (0.71-1.99)    |
| 30-35               |                     |                     | 0.86 (0.49-1.51)    |
| 35-45               |                     |                     | 1.01 (0.58-1.74)    |
| >45                 |                     |                     | 0.77 (0.37-1.59)    |

- Results shown as HR (95% C.I.), \*  $p < 0.05$ , \*\*  $p < 0.0001$ .

**Table S2.** Comparison of Cox regression model results for the evaluation of a possible confounding effect of treatment in the year before the 1<sup>st</sup> dose for time to negativization of a positive Pap smear. Model 1 is the univariate model, and Model 4 is the model including the history of a conization treatment in the year before the 1<sup>st</sup> dose.

| Variable                                                                             | Model 1             | Model 4             |
|--------------------------------------------------------------------------------------|---------------------|---------------------|
| <b>HPV Vaccine</b>                                                                   |                     |                     |
| No vaccine                                                                           | 1.00                | 1.00                |
| 1° dose                                                                              | 0.70 (0.36-1.33)    | 0.70 (0.36-1.33)    |
| 1°+2° dose                                                                           | 0.95 (0.60-1.52)    | 0.95 (0.60-1.52)    |
| 1°+2°+3° dose                                                                        | 2.66 (1.83-3.86) ** | 2.66 (1.84-3.87) ** |
| <b>Women who underwent a conization within a year before the 1<sup>st</sup> dose</b> |                     |                     |
| Not treated                                                                          |                     | 1.00                |
| Underwent a conization within 365 days before 1 <sup>st</sup> dose                   |                     | 1.05 (0.71-1.56)    |

- Results shown as HR (95% C.I.), \*  $p < 0.05$ , \*\*  $p < 0.0001$ .

**Table S3.** Comparison of Cox regression model results for the evaluation of a possible confounding effect of age at event for time to negativization of an HPV HR+ test. Model 1 is the univariate model, Model 2 is the model including age as a continuous variable and Model 3 is the model including age in 5 classes.

| Variable           | Model 1              | Model 2              | Model 3              |
|--------------------|----------------------|----------------------|----------------------|
| <b>HPV Vaccine</b> |                      |                      |                      |
| No vaccine         | 1.00                 | 1.00                 | 1.00                 |
| 1° dose            | 1.35 (0.47-3.93)     | 1.34 (0.34-2.85)     | 1.32 (0.45-3.84)     |
| 1°+2° dose         | 2.07 (1.04-4.11) *   | 2.05 (1.03-4.09) *   | 2.01 (1.01-4.01) *   |
| 1°+2°+3° dose      | 7.80 (4.83-12.60) ** | 7.78 (4.82-12.58) ** | 7.56 (5.22-13.67) ** |

|                     |                  |
|---------------------|------------------|
| <b>Age at event</b> |                  |
| +1 yr               | 0.99 (0.97-1.02) |
| <25                 | 1.00             |
| 25-30               | 1.92 (0.67-5.50) |
| 30-35               | 1.90 (0.66-5.49) |
| 35-45               | 2.01 (0.71-5.73) |
| >45                 | 1.09 (0.32-3.72) |

- Results shown as HR (95% C.I.), \*  $p < 0.05$ , \*\*  $p < 0.0001$ .

**Table S4.** Comparison of Cox regression model results for the evaluation of a possible confounding effect of treatment in the year before the 1<sup>st</sup> dose for time to negativization of an HPV HR+ test. Model 1 is the univariate model, and Model 4 is the model including the history of a conization treatment in the year before the 1<sup>st</sup> dose.

| Variable                                                                             | Model 1              | Model 4              |
|--------------------------------------------------------------------------------------|----------------------|----------------------|
| <b>HPV Vaccine</b>                                                                   |                      |                      |
| No vaccine                                                                           | 1.00                 | 1.00                 |
| 1 <sup>o</sup> dose                                                                  | 1.35 (0.47-3.93)     | 1.32 (0.45-3.84)     |
| 1 <sup>o</sup> +2 <sup>o</sup> dose                                                  | 2.07 (1.04-4.11) *   | 2.02 (1.01-4.02) *   |
| 1 <sup>o</sup> +2 <sup>o</sup> +3 <sup>o</sup> dose                                  | 7.80 (4.83-12.60) ** | 7.65 (4.72-12.38) ** |
| <b>Women who underwent a conization within a year before the 1<sup>st</sup> dose</b> |                      |                      |
| Not treated                                                                          |                      | 1.00                 |
| Underwent a conization within 365 days before 1 <sup>st</sup> dose                   |                      | 1.28 (0.84-1.93)     |

- Results shown as HR (95% C.I.), \*  $p < 0.05$ , \*\*  $p < 0.0001$ .
